# Supplementary figures and images for: Self-powered sensor for monitoring wind vibration on transmission lines based on an electromagnetic-triboelectric hybrid generator
Source: Royal Society of Chemistry journal article supplement (doi:10.1039/d3se00995e), 2023-01-01

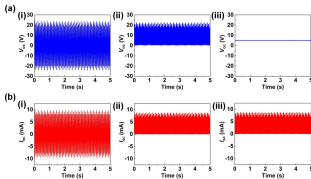

Supplement: d3se00995e1.pdf [file d3se00995e1.pdf]

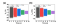

Supplement: d3se00995e2.pdf [file d3se00995e2.pdf]

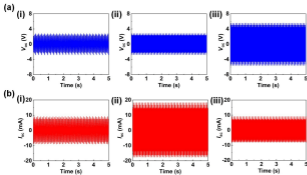

Supplement: d3se00995e3.pdf [file d3se00995e3.pdf]

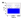

Supplement: d3se00995e4.pdf [file d3se00995e4.pdf]

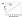

Supplement: d3se00995e5.pdf [file d3se00995e5.pdf]

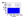

Supplement: d3se00995e6.pdf [file d3se00995e6.pdf]
